# Supplementary material for: Simultaneous Quantification of Multiple Urinary Naphthalene Metabolites by Liquid Chromatography Tandem Mass Spectrometry
Source: PubMed Central journal article supplement (PMC4390350; doi:10.1371/journal.pone.0121937), 2015-04-08

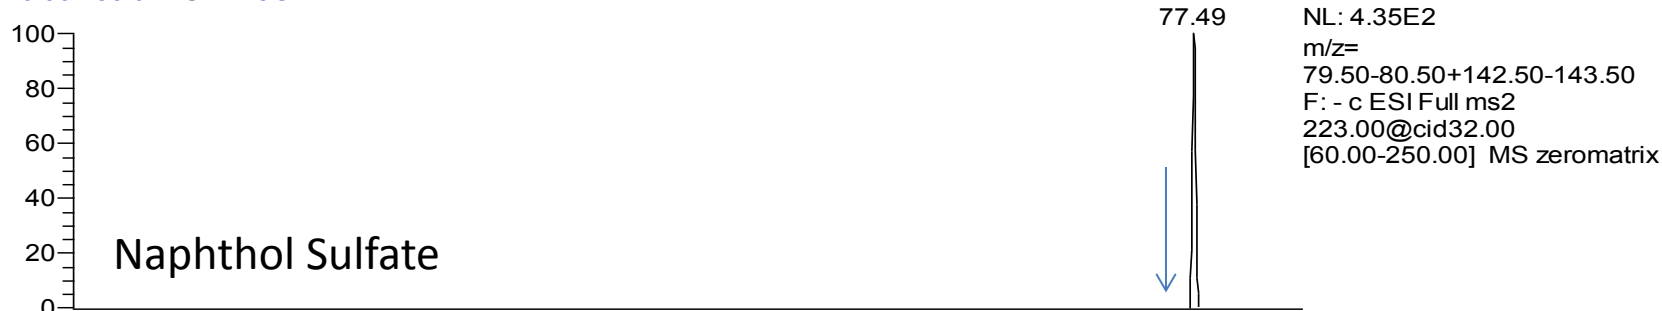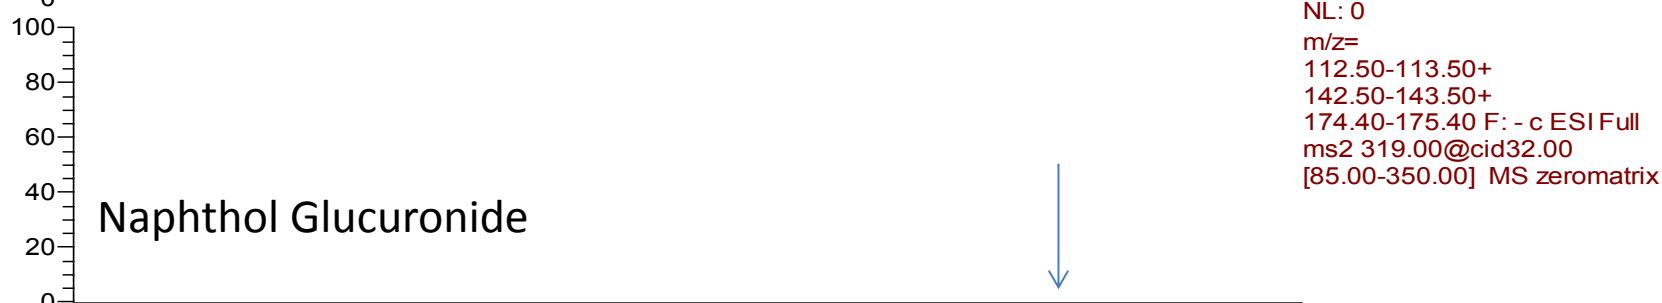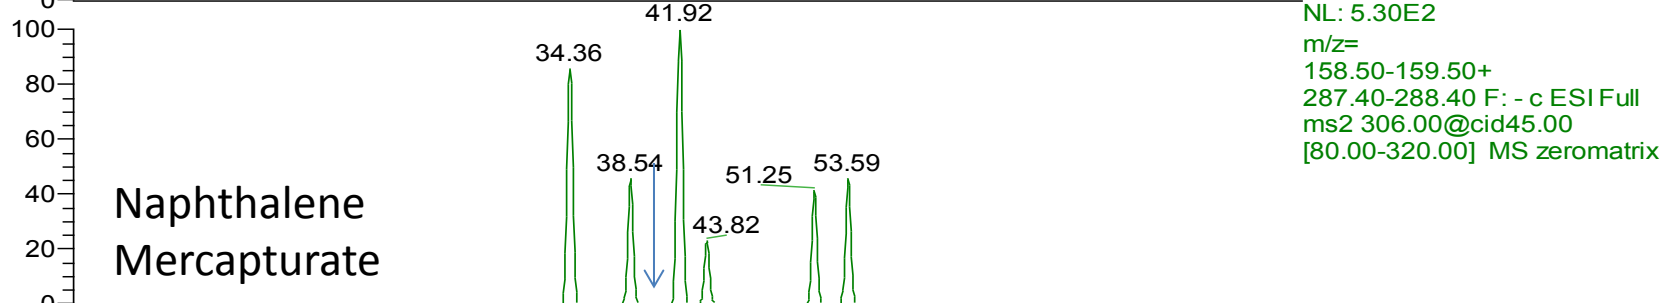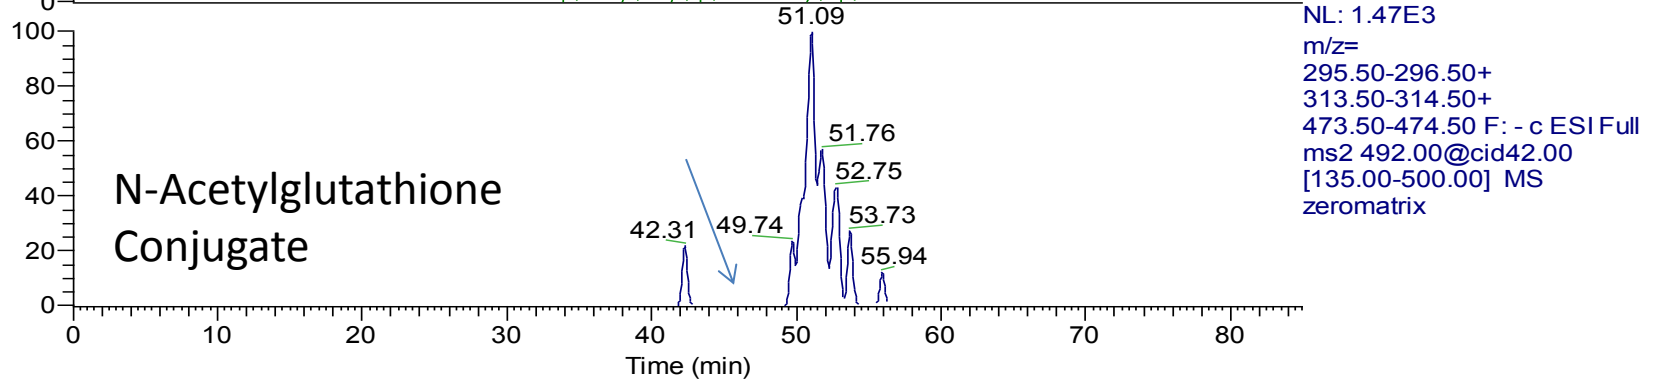

Supplement: pone.0121937.s001.pdf [file pone.0121937.s001.pdf]
