# Supplementary material for: Simultaneous Quantification of Multiple Urinary Naphthalene Metabolites by Liquid Chromatography Tandem Mass Spectrometry
Source: PubMed Central journal article supplement (PMC4390350; doi:10.1371/journal.pone.0121937), 2015-04-08
Supplement: pone.0121937.s003.pdf [file pone.0121937.s003.pdf]

RT: 0.00 - 85.01 SM: 15G

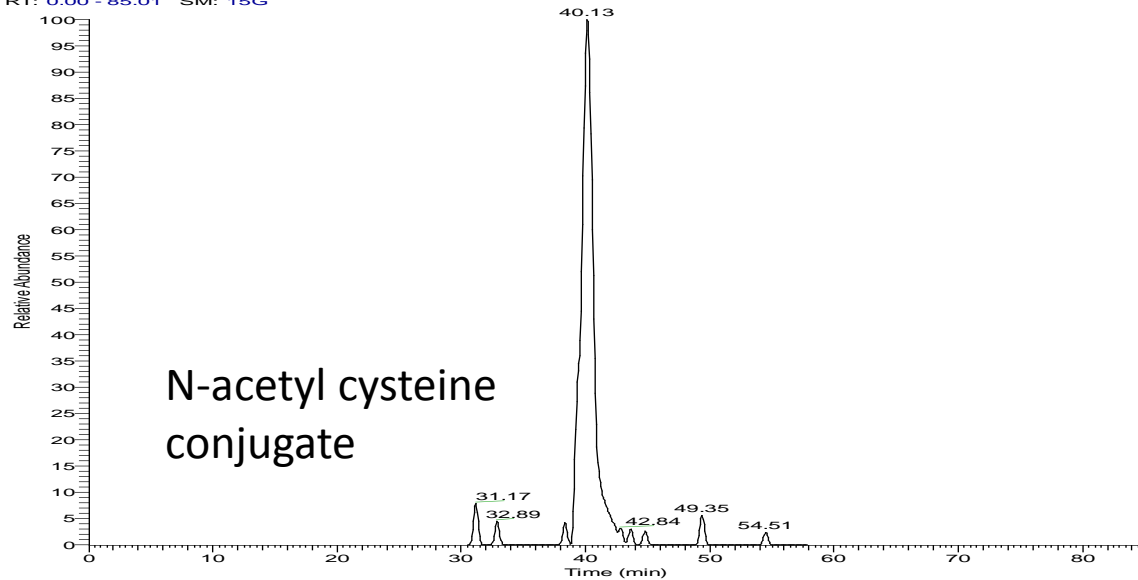

NL: 6.65E3  
m/z=  
158.50-159.50+  
287.40-288.40 F: - c  
ESI Full ms2  
306.00@cid45.00  
[80.00-320.00] MS  
QC1Bd3

N-acetyl cysteine  
conjugate

RT: 0.00 - 85.01 SM: 15G

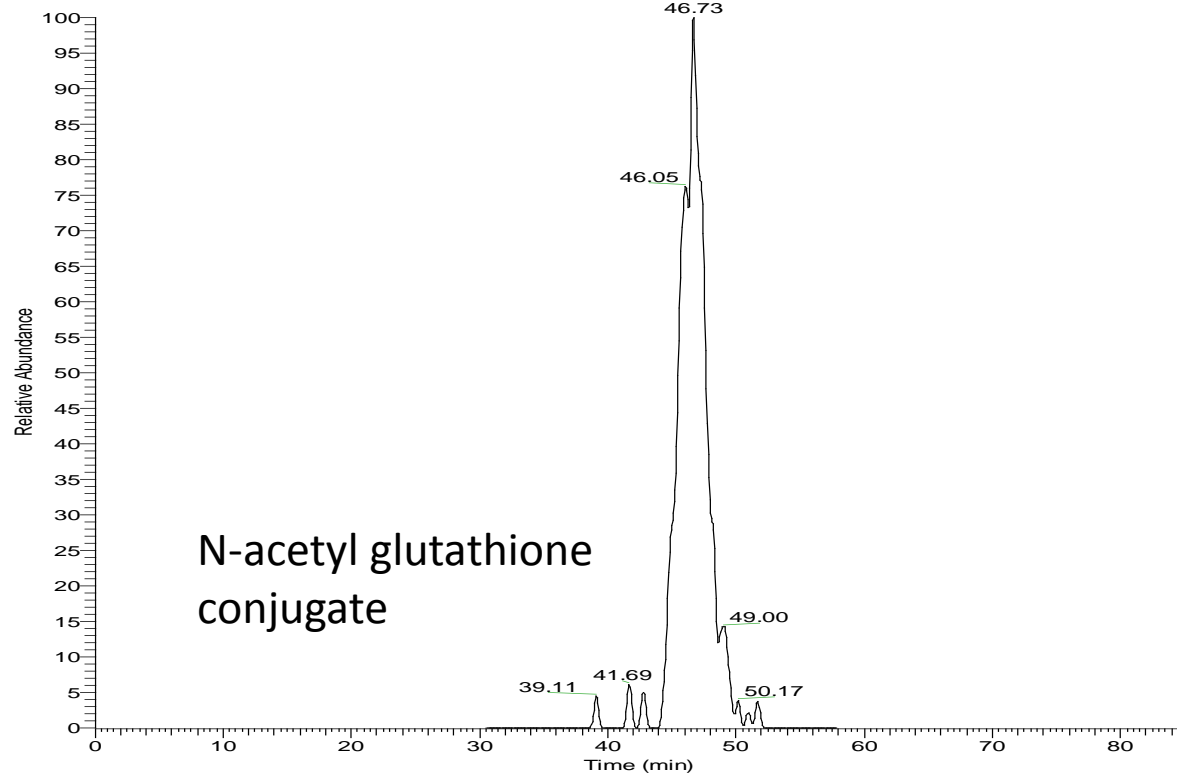

NL: 6.35E3  
m/z=  
295.50-296.50+  
313.50-314.50+  
473.50-474.50 F: - c ESI  
Full ms2 492.00@cid42.00  
[135.00-500.00] MS  
QC2Cd3

N-acetyl glutathione  
conjugate

Supporting Information  
Figure S2B
